# Supplementary material for: Towards the Complete Goat Pan-Genome by Recovering Missing Genomic Segments From the Reference Genome
Source: Front Genet. 2019 Nov 15;10:1169. doi: 10.3389/fgene.2019.01169 (PMC6874019; doi:10.3389/fgene.2019.01169)
Supplement: Supplementary file 6 [file DataSheet_4.xlsx]

## Sheet: Sheet1
Supplementary Table S4. Summary of whole genome resequencing data from 107 goats and 20 bezoars that were used in this study.
Origin region	Domestic/Wild	Origin Country	Subspecies	Breeds/Species	Accession number/ID	Mapping rate	Duplication	Insert size	Depth (X)	3X	4X	Gender	Provider	directory	Sampling site/Closest city
Africa	Domestic	Morocco	Capra hircus	Morocco indigenous population	ERR229474	0.9985	0.0805	334	12.7225	0.9471	0.9363	M	nextgene	moluoge	Mssissi
Africa	Domestic	Morocco	Capra hircus	Morocco indigenous population	ERR229481	0.9988	0.0877	326	13.4953	0.9505	0.9416	M	nextgene	moluoge	Tabante
Africa	Domestic	Morocco	Capra hircus	Morocco indigenous population	ERR229485	0.9985	0.0826	323	12.8365	0.9494	0.939	M	nextgene	moluoge	Chorafa M'daghr
Africa	Domestic	Morocco	Capra hircus	Morocco indigenous population	ERR229487	0.9988	0.0817	317	13.1419	0.9494	0.9401	M	nextgene	moluoge	Tabante
Africa	Domestic	Morocco	Capra hircus	Morocco indigenous population	ERR232492	0.9988	0.0797	327	12.262	0.9461	0.9335	M	nextgene	moluoge	Tabouchit
Africa	Domestic	Morocco	Capra hircus	Morocco indigenous population	ERR299283	0.9989	0.0816	338	13.6174	0.9494	0.9405	M	nextgene	moluoge	unknown
Africa	Domestic	Morocco	Capra hircus	Morocco indigenous population	ERR313257	0.999	0.0747	307	12.2335	0.9469	0.9358	M	nextgene	moluoge	Taouloukoult
Africa	Domestic	Morocco	Capra hircus	Morocco indigenous population	ERR313259	0.9989	0.0913	319	15.0561	0.9526	0.9453	M	nextgene	moluoge	Amrsid
Africa	Domestic	Morocco	Capra hircus	Morocco indigenous population	ERR313266	0.9991	0.0763	298	12.3525	0.9469	0.9361	M	nextgene	moluoge	Zaouyat Bellemkaddem
Africa	Domestic	Morocco	Capra hircus	Morocco indigenous population	ERR313272	0.999	0.0841	314	13.4437	0.9507	0.9416	M	nextgene	moluoge	Smimou
Africa	Domestic	Morocco	Capra hircus	Morocco indigenous population	ERR315505	0.9989	0.0823	298	13.4852	0.9497	0.9409	M	nextgene	moluoge	ASRIR
Africa	Domestic	Morocco	Capra hircus	Morocco indigenous population	ERR315515	0.9989	0.0727	322	11.8881	0.9468	0.9353	M	nextgene	moluoge	Ousalsat
Africa	Domestic	Morocco	Capra hircus	Morocco indigenous population	ERR315516	0.9989	0.0862	303	14.4249	0.9487	0.9406	M	nextgene	moluoge	Akka
Africa	Domestic	Morocco	Capra hircus	Morocco indigenous population	ERR318768	0.9988	0.0814	313	12.8828	0.9462	0.9352	M	nextgene	moluoge	Ayir
Africa	Domestic	Morocco	Capra hircus	Morocco indigenous population	ERR332581	0.9989	0.0726	304	11.8637	0.9454	0.9337	M	nextgene	moluoge	Ben maachou
Africa	Domestic	Morocco	Capra hircus	Morocco indigenous population	ERR332592	0.999	0.0728	314	11.8571	0.9446	0.9327	M	nextgene	moluoge	Tetouan
Africa	Domestic	Morocco	Capra hircus	Morocco indigenous population	ERR340428	0.9989	0.0798	316	12.8949	0.9497	0.94	M	nextgene	moluoge	Asjen
Africa	Domestic	Morocco	Capra hircus	Morocco indigenous population	ERR345973	0.9991	0.0703	331	11.5333	0.9462	0.9336	M	nextgene	moluoge	Moulay bouazza
East Asia	Domestic	Inner Mongolia, North China	Capra hircus	Erdos	D10	0.999	0.0494	404	11.3055	0.9361	0.9276	F	Dr.WangXiaoLong	WXL	Erdos , Inner Mongolia,China
East Asia	Domestic	Inner Mongolia, North China	Capra hircus	Erdos	D11	0.9989	0.0497	400	11.2475	0.9354	0.9267	F	Dr.WangXiaoLong	WXL	Erdos , Inner Mongolia,China
East Asia	Domestic	Inner Mongolia, North China	Capra hircus	Erdos	D2	0.999	0.0491	411	11.262	0.9344	0.9261	F	Dr.WangXiaoLong	WXL	Erdos , Inner Mongolia,China
East Asia	Domestic	Inner Mongolia, North China	Capra hircus	Erdos	D3	0.9969	0.0498	404	11.2406	0.9359	0.9272	F	Dr.WangXiaoLong	WXL	Erdos , Inner Mongolia,China
East Asia	Domestic	Inner Mongolia, North China	Capra hircus	Erdos	D4	0.999	0.0495	403	11.3314	0.9356	0.9274	F	Dr.WangXiaoLong	WXL	Erdos , Inner Mongolia,China
East Asia	Domestic	Inner Mongolia, North China	Capra hircus	Erdos	D5	0.999	0.0498	397	11.3174	0.9361	0.9278	F	Dr.WangXiaoLong	WXL	Erdos , Inner Mongolia,China
East Asia	Domestic	Inner Mongolia, North China	Capra hircus	Erdos	D6	0.9989	0.0497	406	11.2194	0.9349	0.9263	F	Dr.WangXiaoLong	WXL	Erdos , Inner Mongolia,China
East Asia	Domestic	Inner Mongolia, North China	Capra hircus	Erdos	D7	0.999	0.0497	399	11.2368	0.9363	0.9278	F	Dr.WangXiaoLong	WXL	Erdos , Inner Mongolia,China
East Asia	Domestic	Inner Mongolia, North China	Capra hircus	Erdos	D8	0.999	0.05	395	11.3106	0.9362	0.9279	F	Dr.WangXiaoLong	WXL	Erdos , Inner Mongolia,China
East Asia	Domestic	Inner Mongolia, North China	Capra hircus	Erdos	D9	0.9989	0.05	403	11.2444	0.9352	0.9263	F	Dr.WangXiaoLong	WXL	Erdos , Inner Mongolia,China
East Asia	Domestic	Jianzha, Qinghai, China	Capra hircus	Qinghai Tibetan goat	QG_47_3	0.9907	0.0507	331	10.8789	0.9322	0.9186	M	Dr.WangXiaoLong	tibetan	Jianzha, Qinghai, China
East Asia	Domestic	Jianzha, Qinghai, China	Capra hircus	Qinghai Tibetan goat	QG_49_2	0.9958	0.0517	336	11.2302	0.9347	0.9223	M	Dr.WangXiaoLong	tibetan	Jianzha, Qinghai, China
East Asia	Domestic	Jian Zha, Qinghai, China	Capra hircus	Qinghai Tibetan goat	QG_50_2	0.994	0.0509	336	11.254	0.932	0.92	M	Dr.WangXiaoLong	tibetan	Jianzha, Qinghai, China
East Asia	Domestic	Jian Zha, Qinghai, China	Capra hircus	Qinghai Tibetan goat	QG_51_3	0.9894	0.0521	334	11.5347	0.934	0.9226	M	Dr.WangXiaoLong	tibetan	Jianzha, Qinghai, China
East Asia	Domestic	Jian Zha, Qinghai, China	Capra hircus	Qinghai Tibetan goat	QG_57_2	0.9943	0.048	328	10.2588	0.9301	0.9141	M	Dr.WangXiaoLong	tibetan	Jianzha, Qinghai, China
East Asia	Domestic	Jian Zha, Qinghai, China	Capra hircus	Qinghai Tibetan goat	QG_59_2	0.9928	0.052	328	11.4889	0.9333	0.9218	M	Dr.WangXiaoLong	tibetan	Jianzha, Qinghai, China
East Asia	Domestic	Inner Mongolia, North China	Capra hircus	Erdos	S10	0.9992	0.049	389	11.2166	0.9346	0.9262	F	Dr.WangXiaoLong	WXL	Erdos , Inner Mongolia,China
East Asia	Domestic	Inner Mongolia, North China	Capra hircus	Erdos	S11	0.9989	0.0501	395	11.2314	0.9362	0.9277	F	Dr.WangXiaoLong	WXL	Erdos , Inner Mongolia,China
East Asia	Domestic	Inner Mongolia, North China	Capra hircus	Erdos	S12	0.993	0.0495	389	11.1693	0.9357	0.9271	F	Dr.WangXiaoLong	WXL	Erdos , Inner Mongolia,China
East Asia	Domestic	Inner Mongolia, North China	Capra hircus	Erdos	S13	0.9992	0.0494	394	11.2696	0.9348	0.9265	F	Dr.WangXiaoLong	WXL	Erdos , Inner Mongolia,China
East Asia	Domestic	Inner Mongolia, North China	Capra hircus	Erdos	S15	0.9992	0.0496	395	11.2098	0.9357	0.9273	F	Dr.WangXiaoLong	WXL	Erdos , Inner Mongolia,China
East Asia	Domestic	Inner Mongolia, North China	Capra hircus	Erdos	S2	0.9989	0.0493	400	11.2706	0.9354	0.9272	F	Dr.WangXiaoLong	WXL	Erdos , Inner Mongolia,China
East Asia	Domestic	Inner Mongolia, North China	Capra hircus	Erdos	S3	0.9992	0.0494	401	11.2234	0.9361	0.9276	F	Dr.WangXiaoLong	WXL	Erdos , Inner Mongolia,China
East Asia	Domestic	Inner Mongolia, North China	Capra hircus	Erdos	S4	0.9987	0.0489	406	11.2274	0.9346	0.9261	F	Dr.WangXiaoLong	WXL	Erdos , Inner Mongolia,China
East Asia	Domestic	Inner Mongolia, North China	Capra hircus	Erdos	S5	0.9989	0.0497	402	11.2625	0.9363	0.9279	F	Dr.WangXiaoLong	WXL	Erdos , Inner Mongolia,China
East Asia	Domestic	Tibet, China	Capra hircus	Bange Cashmere goat	T14	0.9987	0.0978	427	12.5211	0.9378	0.9139	F	Dr.Ma	Dong	Bange district,Tibeti,China
East Asia	Domestic	Guangxi, South China	Capra hircus	Nubian-Longlin goat, F1	Wm102-3	0.9961	0.0937	490	19.2163	0.9398	0.9338	F	Dr.CaoYanhong	PXY	Longlin
East Asia	Domestic	Guangxi, South China	Capra hircus	Longlin goat	Wme01-3	0.9936	0.0931	479	18.6835	0.9364	0.9293	F	Dr.CaoYanhong	PXY	Longlin
East Asia	Domestic	Guangxi, South China	Capra hircus	Longlin goat	Wme02-3	0.9956	0.1227	482	25.5582	0.9434	0.9385	F	Dr.CaoYanhong	PXY	Longlin
East Asia	Domestic	Guangxi, South China	Capra hircus	Chinese Nubian goat	Wmr01-3	0.9953	0.0976	487	19.2808	0.9413	0.9337	M	Dr.CaoYanhong	PXY	Longlin
East Asia	Domestic	Guangxi, South China	Capra hircus	Nubian-Longlin goat, F1	Xm102-1	0.9845	0.083	467	15.6871	0.9319	0.9216	F	Dr.CaoYanhong	PXY	Longlin
East Asia	Domestic	Guangxi, South China	Capra hircus	Nubian-Longlin goat, F1	Xm102-6	0.996	0.0511	508	7.8219	0.8881	0.8355	F	Dr.CaoYanhong	PXY	Longlin
East Asia	Domestic	Guangxi, South China	Capra hircus	Longlin goat	Xme01-1	0.9974	0.0623	467	12.1459	0.9293	0.9182	F	Dr.CaoYanhong	PXY	Longlin
East Asia	Domestic	Guangxi, South China	Capra hircus	Longlin goat	XME01-6	0.994	0.0706	500	13.4618	0.9296	0.9171	F	Dr.CaoYanhong	PXY	Longlin
East Asia	Domestic	Guangxi, South China	Capra hircus	Longlin goat	Xme02-1	0.9974	0.0629	494	10.8617	0.9091	0.8799	F	Dr.CaoYanhong	PXY	Longlin
East Asia	Domestic	Guangxi, South China	Capra hircus	Chinese Nubian goat	Xmr01-6	0.9962	0.0746	460	13.6962	0.9268	0.9103	M	Dr.CaoYanhong	PXY	Longlin
East Asia	Domestic	Guangxi, South China	Capra hircus	Chinese Nubian goat	xmr02-6	0.9972	0.0615	479	9.8464	0.9128	0.8808	M	Dr.CaoYanhong	PXY	Longlin
East Asia	Domestic	Tibet, China	Capra hircus	Tibetan white goat	M3	0.9982	0.0779	406	11.8397	0.9403	0.9306	F	Dr.Liu bin	Dong	A li district,Tibeti,China
East Asia	Domestic	Tibet, China	Capra hircus	Ritu Cashmere goat	T16	0.9985	0.0688	418	11.234	0.9413	0.9304	F	Dr.Ma	Dong	Ritu district ,Tibeti,China
Europe	Domestic	Italy	Capra hircus	Italy goat	ERR405774	0.995	0.0876	336	14.1132	0.945	0.9358	F	nextgene	ITCH	Rome, Italy
Europe	Domestic	Italy	Capra hircus	Italy goat	ERR405775	0.9948	0.0899	327	14.4178	0.9447	0.9361	F	nextgene	ITCH	Rome, Italy
Europe	Domestic	Italy	Capra hircus	Italy goat	ERR405776	0.9934	0.0869	331	13.6873	0.9425	0.9318	F	nextgene	ITCH	Rome, Italy
Europe	Domestic	Italy	Capra hircus	Italy goat	ERR405777	0.9933	0.0889	339	13.8459	0.9435	0.9328	F	nextgene	ITCH	Rome, Italy
Europe	Domestic	Italy	Capra hircus	Italy goat	ERR405778	0.9906	0.09	355	13.6748	0.9443	0.9323	F	nextgene	ITCH	Rome, Italy
Europe	Domestic	France	Capra hircus	Saanen	ERR470101	0.9978	0.0814	302	13.4456	0.9454	0.9379	F	nextgene	AUFR	Marseille, France
Europe	Domestic	France	Capra hircus	Saanen	ERR470102	0.9989	0.0891	310	13.245	0.9475	0.9404	F	nextgene	AUFR	Marseille, France
Europe	Domestic	France	Capra hircus	Alpine	ERR470103	0.9989	0.0861	301	14.2284	0.9487	0.9425	F	nextgene	AUFR	Marseille, France
Europe	Domestic	France	Capra hircus	Alpine	ERR470105	0.9989	0.0822	312	13.8856	0.9472	0.9406	F	nextgene	AUFR	Marseille, France
Europe	Domestic	Netherlands	Capra hircus	Saanen	S1	0.9989	0.0697	330	11.1063	0.9409	0.9251	M	Dr.ZhangWenGuang	Dong	Geneve, Switzerland
Europe	Domestic	France	Capra hircus	Alpine	A1	0.9991	0.0881	326	13.8259	0.9468	0.9352	M	Dr.ZhangWenGuang	Dong	Marseille, France
Europe	Domestic	Netherlands	Capra hircus	Dries	CD1	0.9992	0.1003	318	13.5604	0.9377	0.9191	M	Dr.ZhangWenGuang	Dong	Groningen, Netherlands
Europe	Domestic	Netherlands	Capra hircus	Terry	CT1	0.9989	0.087	336	14.0092	0.9474	0.9393	F	Dr.ZhangWenGuang	Dong	Groningen, Netherlands
Europe	Domestic	France	Capra hircus	Poitou goat	P1	0.9992	0.0872	291	14.3994	0.9516	0.9434	M	Dr.ZhangWenGuang	Dong	Bamako, MALI, Africa
Europe	Domestic	Spain	Capra hircus	Spain goat	SP1	0.9987	0.0916	314	13.8015	0.9355	0.9214	F	Dr.ZhangWenGuang	Dong	Valladolid, Spain
Europe	Domestic	Spain	Capra hircus	Spain goat	SP4	0.9982	0.0653	319	10.4407	0.9372	0.9233	F	Dr.ZhangWenGuang	Dong	Valladolid, Spain
Middle East	Domestic	Iran	Capra hircus	Iran indigenous population	A14	0.9974	0.0984	274	13.2549	0.9358	0.9199	F	Dr.Ali	Dong	Abadan, Iran
Middle East	Domestic	Iran	Capra hircus	Najdi goat	A23	0.9921	0.0874	433	11.8214	0.9285	0.9018	F	Dr.Ali	Dong	Esfahan, Iran
Middle East	Domestic	Iran	Capra hircus	Hormozgan tali goat	A25	0.9981	0.0771	421	10.2584	0.9174	0.885	F	Dr.Ali	Dong	Chahbahar, Iran
Middle East	Domestic	Iran	Capra hircus	Khalkhali goat	AL1	0.987	0.0918	304	15.181	0.9427	0.9325	F	Dr.Dong	Dong	Tehran-Mehrabad, Iran
Middle East	Domestic	Iran	Capra hircus	Iran indigenous population	ERR297229	0.9988	0.0763	302	12.7989	0.9416	0.9338	F	nextgene	IRCH	Tehran-Mehrabad, Iran
Middle East	Domestic	Iran	Capra hircus	Iran indigenous population	ERR299449	0.9988	0.0772	319	12.8077	0.943	0.935	F	nextgene	IRCH	Tehran-Mehrabad, Iran
Middle East	Domestic	Iran	Capra hircus	Iran indigenous population	ERR299456	0.9988	0.0752	354	12.6279	0.9427	0.9345	F	nextgene	IRCH	Tehran-Mehrabad, Iran
Middle East	Domestic	Iran	Capra hircus	Iran indigenous population	ERR313197	0.9988	0.0717	310	11.8517	0.9419	0.9298	M	nextgene	IRCH	Tehran-Mehrabad, Iran
Middle East	Domestic	Iran	Capra hircus	Iran indigenous population	ERR313198	0.9991	0.0691	323	11.7628	0.9374	0.9279	F	nextgene	IRCH	Tehran-Mehrabad, Iran
Middle East	Domestic	Iran	Capra hircus	Iran indigenous population	ERR313199	0.9989	0.0812	318	13.444	0.9491	0.9398	M	nextgene	IRCH	Tehran-Mehrabad, Iran
Middle East	Domestic	Iran	Capra hircus	Iran indigenous population	ERR313200	0.999	0.0794	340	13.4891	0.9453	0.9383	F	nextgene	IRCH	Tehran-Mehrabad, Iran
Middle East	Domestic	Iran	Capra hircus	Iran indigenous population	ERR313202	0.9989	0.0791	337	12.8455	0.949	0.9417	F	nextgene	IRCH	Tehran-Mehrabad, Iran
Middle East	Domestic	Iran	Capra hircus	Iran indigenous population	ERR313204	0.9989	0.0776	325	12.7132	0.9455	0.9376	F	nextgene	IRCH	Tehran-Mehrabad, Iran
Middle East	Domestic	Iran	Capra hircus	Iran indigenous population	ERR313206	0.9991	0.07	305	11.7745	0.939	0.9266	M	nextgene	IRCH	Tehran-Mehrabad, Iran
Middle East	Domestic	Iran	Capra hircus	Makoo goat	AJ1	0.9864	0.0756	336	11.8337	0.939	0.927	F	Dr.Dong	Dong	Tabriz, Iran
West Asia	Domestic	Iran	Capra hircus	Iran indigenous population	ERR313207	0.999	0.0778	330	13.2387	0.9438	0.9367	F	nextgene	IRCH	Tehran-Mehrabad, Iran
West Asia	Domestic	Iran	Capra hircus	Iran indigenous population	ERR313209	0.9989	0.071	306	11.778	0.943	0.9341	F	nextgene	IRCH	Tehran-Mehrabad, Iran
West Asia	Domestic	Iran	Capra hircus	Iran indigenous population	ERR313210	0.999	0.0762	317	12.9777	0.9425	0.935	F	nextgene	IRCH	Tehran-Mehrabad, Iran
West Asia	Domestic	Iran	Capra hircus	Iran indigenous population	ERR313211	0.9991	0.0769	323	12.7235	0.9474	0.9374	M	nextgene	IRCH	Tehran-Mehrabad, Iran
West Asia	Domestic	Iran	Capra hircus	Iran indigenous population	ERR313212	0.9991	0.0748	322	12.795	0.9423	0.9344	F	nextgene	IRCH	Tehran-Mehrabad, Iran
West Asia	Domestic	Iran	Capra hircus	Iran indigenous population	ERR313213	0.9991	0.0769	331	12.8752	0.9469	0.9371	M	nextgene	IRCH	Tehran-Mehrabad, Iran
West Asia	Domestic	Iran	Capra hircus	Iran indigenous population	ERR313215	0.9988	0.0744	325	12.4134	0.9396	0.9307	F	nextgene	IRCH	Tehran-Mehrabad, Iran
West Asia	Domestic	Iran	Capra hircus	Iran indigenous population	ERR340332	0.9989	0.0663	339	11.2056	0.9407	0.9308	F	nextgene	IRCH	Tehran-Mehrabad, Iran
West Asia	Domestic	Iran	Capra hircus	Iran indigenous population	ERR340337	0.9992	0.0644	333	10.8622	0.9373	0.9224	M	nextgene	IRCH	Tehran-Mehrabad, Iran
West Asia	Domestic	Iran	Capra hircus	Iran indigenous population	ERR340339	0.9992	0.069	321	11.3519	0.942	0.9286	M	nextgene	IRCH	Tehran-Mehrabad, Iran
West Asia	Domestic	Iran	Capra hircus	Iran indigenous population	FS1	0.9888	0.0742	335	12.439	0.9363	0.9196	F	Dr.Dong	Dong	Shira, Iran
West Asia	Domestic	Iran	Capra hircus	Hamedan goat	HM1	0.9918	0.086	313	15.9975	0.9468	0.9412	F	Dr.Dong	Dong	Krmanshah, Iran
West Asia	Domestic	Iran	Capra hircus	Nodushan goat	Y16	0.9928	0.0343	399	7.2592	0.9024	0.8579	F	Dr.Dong	Dong	Yazd, Iran
West Asia	Domestic	Iran	Capra hircus	Iran indigenous population	Y2	0.992	0.0682	314	10.4924	0.9281	0.904	F	Dr.Dong	Dong	Arak, Iran
West Asia	Domestic	Iran	Capra hircus	Saghez goat	Y21	0.9782	0.0459	330	9.1157	0.9274	0.908	F	Dr.Ali	Dong	Krmanshah, Iran
West Asia	Domestic	Iran	Capra hircus	Iran indigenous population	Y3	0.9962	0.0542	546	6.2347	0.8243	0.7205	F	Dr.Ali	Dong	Abu Dhabi, United Arab Emirates
West Asia	Domestic	Iran	Capra hircus	Iran indigenous population	Y6	0.9908	0.0553	341	9.7428	0.9303	0.9122	F	Dr.Ali	Dong	Zanjan, Iran
West Asia	Domestic	Iran	Capra hircus	kurdish goat	KD1	0.9904	0.0633	291	9.7406	0.9356	0.9181	F	Dr.Dong	Dong	Tehran-Mehrabad, Iran
West Asia	Domestic	Iran	Capra hircus	Iran indigenous population	KH1	0.9921	0.0853	328	13.5116	0.9388	0.9268	F	Dr.Dong	Dong	Arak, Iran
Bezoar	Bezoar	Iran	Capra aegagrus	Bezoar	ERR340328	0.9988	0.0413	331	6.5146	0.882	0.8193	F	nextgene	Capra_aegagrus	Semnan, Iran
Bezoar	Bezoar	Iran	Capra aegagrus	Bezoar	ERR340330	0.9985	0.0743	336	12.3346	0.9432	0.932	M	nextgene	Capra_aegagrus	Semnan, Iran
Bezoar	Bezoar	Iran	Capra aegagrus	Bezoar	ERR340331	0.9989	0.0705	355	11.6505	0.9376	0.9244	M	nextgene	Capra_aegagrus	Semnan, Iran
Bezoar	Bezoar	Iran	Capra aegagrus	Bezoar	ERR340333	0.9987	0.0408	310	6.3528	0.8788	0.8071	M	nextgene	Capra_aegagrus	Semnan, Iran
Bezoar	Bezoar	Iran	Capra aegagrus	Bezoar	ERR340334	0.9988	0.0748	348	12.1131	0.9448	0.9331	M	nextgene	Capra_aegagrus	Semnan, Iran
Bezoar	Bezoar	Iran	Capra aegagrus	Bezoar	ERR340335	0.9984	0.0414	347	6.6202	0.8886	0.8257	M	nextgene	Capra_aegagrus	Semnan, Iran
Bezoar	Bezoar	Iran	Capra aegagrus	Bezoar	ERR340336	0.999	0.0407	334	6.5114	0.8823	0.8172	M	nextgene	Capra_aegagrus	Semnan, Iran
Bezoar	Bezoar	Iran	Capra aegagrus	Bezoar	ERR340338	0.9991	0.0678	364	11.3674	0.9413	0.928	M	nextgene	Capra_aegagrus	Semnan, Iran
Bezoar	Bezoar	Iran	Capra aegagrus	Bezoar	ERR340340	0.9948	0.0732	299	12.0666	0.9423	0.9301	M	nextgene	Capra_aegagrus	Semnan, Iran
Bezoar	Bezoar	Iran	Capra aegagrus	Bezoar	ERR340342	0.9985	0.0403	342	6.4207	0.8809	0.8125	M	nextgene	Capra_aegagrus	Semnan, Iran
Bezoar	Bezoar	Iran	Capra aegagrus	Bezoar	ERR340343	0.9938	0.0451	327	7.2617	0.9035	0.8567	M	nextgene	Capra_aegagrus	Semnan, Iran
Bezoar	Bezoar	Iran	Capra aegagrus	Bezoar	ERR340344	0.9985	0.0678	345	11.2003	0.9406	0.9267	M	nextgene	Capra_aegagrus	Semnan, Iran
Bezoar	Bezoar	Iran	Capra aegagrus	Bezoar	ERR340345	0.9841	0.0692	310	11.6005	0.9372	0.9241	M	nextgene	Capra_aegagrus	Semnan, Iran
Bezoar	Bezoar	Iran	Capra aegagrus	Bezoar	ERR340347	0.9991	0.0866	289	12.7041	0.9434	0.931	M	nextgene	Capra_aegagrus	Semnan, Iran
Bezoar	Bezoar	Iran	Capra aegagrus	Bezoar	ERR340348	0.9988	0.0675	351	10.7214	0.9415	0.926	M	nextgene	Capra_aegagrus	Semnan, Iran
Bezoar	Bezoar	Iran	Capra aegagrus	Bezoar	ERR340426	0.9951	0.0757	313	12.3592	0.9446	0.9335	M	nextgene	Capra_aegagrus	Semnan, Iran
Bezoar	Bezoar	Iran	Capra aegagrus	Bezoar	ERR470100	0.9958	0.0979	292	15.0368	0.9354	0.9167	M	nextgene	Capra_aegagrus	Semnan, Iran
Bezoar	Bezoar	Iran	Capra aegagrus	Bezoar	ERR470104	0.9985	0.087	288	14.4415	0.9479	0.9376	M	nextgene	Capra_aegagrus	Semnan, Iran
Bezoar	Bezoar	Iran	Capra aegagrus	Bezoar	ERR470106	0.9548	0.0957	312	14.661	0.9367	0.9178	M	nextgene	Capra_aegagrus	Semnan, Iran
Bezoar	Bezoar	Iran	Capra aegagrus	Bezoar	IRCA-C3-1002	0.9958	0.2224	170	43.7038	0.9572	0.9541	F		denovo	Semnan, Iran
